# Supplementary material for: The HER2 inhibitor TAK165 Sensitizes Human Acute Myeloid Leukemia Cells to Retinoic Acid-Induced Myeloid Differentiation by activating MEK/ERK mediated RARα/STAT1 axis
Source: PubMed Central journal article supplement (PMC4830980; doi:10.1038/srep24589), 2016-04-14
Supplement: srep24589-s1.pdf [file srep24589-s1.pdf]

**The HER2 inhibitor TAK165 Sensitizes Human Acute Myeloid Leukemia Cells to Retinoic Acid-Induced Myeloid Differentiation by activating MEK/ERK mediated RAR $\alpha$ /STAT1 axis**

Xuejing Shao<sup>#</sup>, Yujia Liu<sup>#</sup>, Yangling Li, Miao Xian, Qian Zhou, Bo Yang, Meidan Ying\* and Qiaojun He\*

Zhejiang Province Key Laboratory of Anti-Cancer Drug Research, Institute of Pharmacology and Toxicology, School of Pharmaceutical Sciences, Zhejiang University, Hangzhou, Zhejiang, China.

\*Corresponding Authors: Meidan Ying, Ph.D. and Qiaojun He, Ph.D., Room 113, Institute of Pharmacology and Toxicology, College of Pharmaceutical Sciences, Zhejiang University, Hangzhou, China, 310058. Phone/Fax: 86-571-88208400; E-mail: Mying@zju.edu.cn (M. Ying); qiaojunhe@zju.edu.cn (Q. He).

# These authors contribute equally to this manuscript.

**Supplementary Figures**

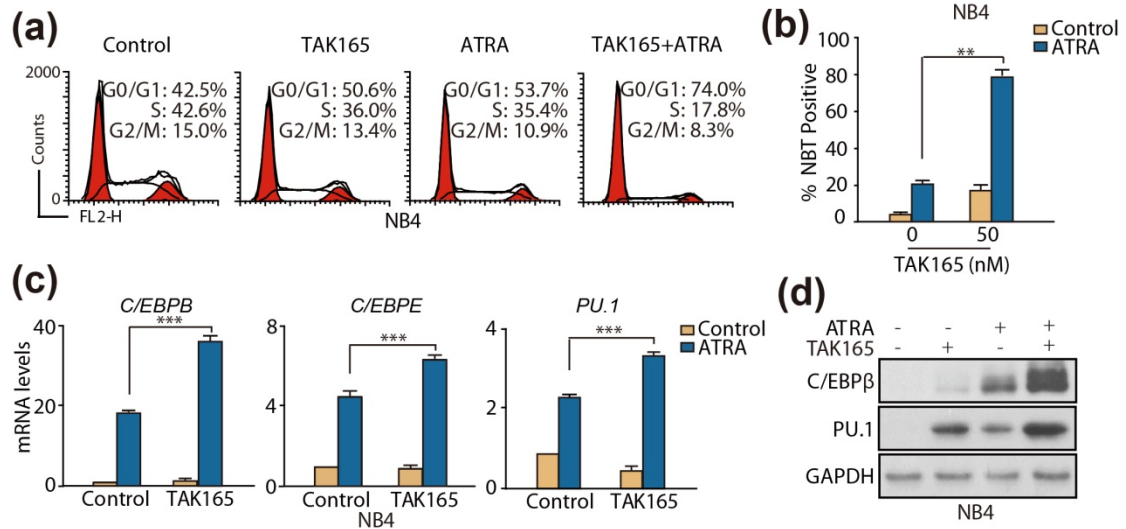

**Supplementary Fig. S1. Effect of TAK165 and ATRA combination on NB4 cell Differentiation**

(a) NB4 cell flow cytometric cycle proportion assay. Cells were treated with 50nM TAK165 in the presence of vehicle or 2 nM ATRA for 3 days. (b) NBT-positive NB4 cells were counted in the presence of TAK165 and ATRA (2nM) for 3 days. (c) *CEBPB*, *CEBPE* and *PU.1* mRNA levels in NB4 cell as determined by real-time PCR. Cells were treated with 50nM TAK165 in the presence of 2nM ATRA for 1 day. GAPDH expression was used as an internal control gene. (d) Western blot analysis of PU.1, C/EBPβ in NB4. Cells were treated with 50nM TAK165 in the presence of 2nM ATRA for 3 day. (a)-(c), the data are presented as the mean ± SD of 3 independent experiments. \*\*, p<0.01; \*\*\*, p<0.001.

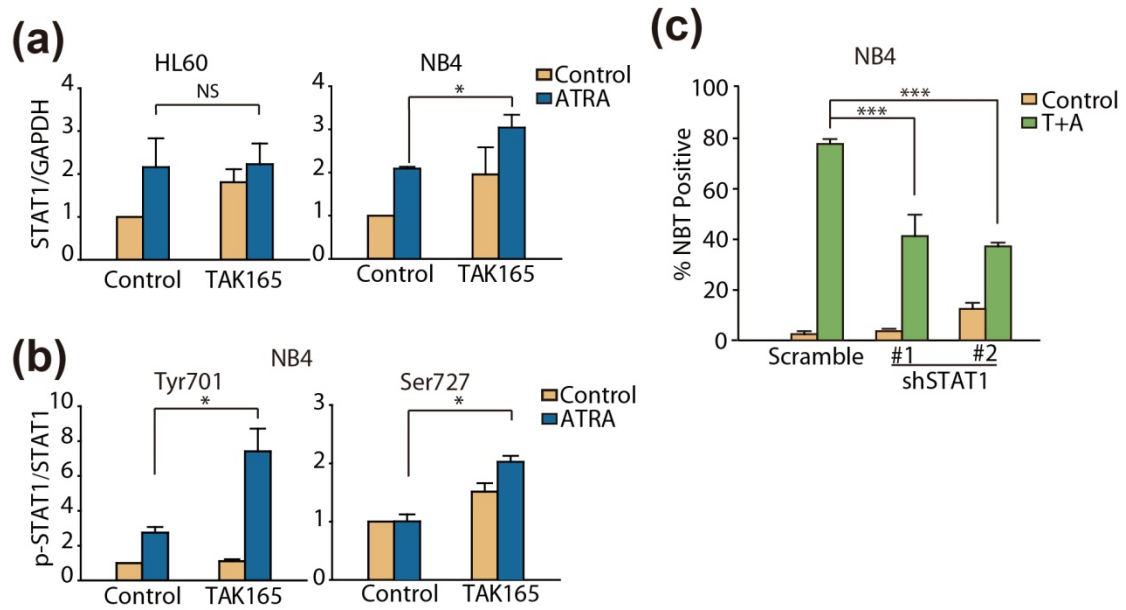

**Supplementary Fig. S2. Effect of STAT1 activation on TAK165 and ATRA combination in NB4 cell differentiation**

(a) The relative STAT1 level of AML cells was detected by STAT1/GAPDH. (b) The relative phosphorylation level of STAT1 at Tyr701 and Ser727 in the NB4 cells, were evaluated by p-STAT1 (Tyr701 or Ser727) / STAT1. (c) CD11b-positive cells were counted in NB4-scramble and NB4-shRNA-STAT1 cells. NB4 cell was treated with TAK165 (50nM) and ATRA (2nM) for 3 days.\*\*\*,  $p < 0.001$ . The data represent the mean  $\pm$  SD of 3 independent experiments.
